# Supplementary material for: Genetic signatures of gene flow and malaria-driven natural selection in sub-Saharan populations of the "endemic Burkitt Lymphoma belt"
Source: PLoS Genet. 2019 Mar 8;15(3):e1008027. doi: 10.1371/journal.pgen.1008027 (PMC6426263; doi:10.1371/journal.pgen.1008027)
Supplement: S6 Table — The SNP with the highest PBS value for each candidate gene is tabulated. (XLSX) [file pgen.1008027.s025.xlsx]

## Sheet: Plan1
Chromosome	Position	SNP ID	Gene	Gene distance (pb)	XPEHH	PBS	p-value
1	173756803	rs10489893	KLHL20	dist=963	6.00712	0.465067	0.00209
1	203651927	rs1541252	ATP2B4	dist=0	4.11652	0.681345	0.00109
3	100054160	rs277630	NIT2	dist=0	2.59614	0.395339	0.00269
4	175661843	rs6850542	GLRA3	dist=0	3.37473	0.465327	0.00209
4	183424808	rs6856951	TENM3	dist=0	3.30812	0.454812	0.00218
8	50670261	rs4873371	LOC100507464;SNTG1	dist=245522;dist=152025	2.50436	0.39545	0.00269
9	35533348	rs7041770	RUSC2	dist=0	3.83466	0.365808	0.00296
11	61249383	rs3019200	PPP1R32	dist=0	2.07257	0.390157	0.00273
14	67067838	rs10220648	GPHN	dist=0	2.35522	0.308566	0.00355
14	67801716	rs1044750	MPP5	dist=0	5.12243	0.425918	0.00242
14	73365333	rs1861161	DPF3;DCAF4	dist=4509;dist=27707	3.29878	0.341261	0.00323
15	28359744	rs7495441	HERC2	dist=0	2.93009	0.529782	0.00162
